# Supplementary material for: Amino-functionalized Cu-MOF for efficient purification of methane from light hydrocarbons and excellent catalytic performance
Source: Royal Society of Chemistry journal article supplement (doi:10.1039/c8qi01404c), 2019-01-01
Supplement: c8qi01404c1.pdf [file c8qi01404c1.pdf]

## SUPPORTING INFORMATION

---

### Supporting Information

#### **Amino-functionalized Cu-MOF for efficient purification methane from light hydrocarbons and excellent catalytic performance**

Xia Wang, Xiurong Zhang, Kai Zhang, Xiaokang Wang, Yutong Wang, Weidong Fan\* and Fangna Dai\*

School of Materials Science and Engineering, College of Science, China University of Petroleum (East China), Qingdao, Shandong 266580, People's Republic of China.

Email: weidongfan@163.com; fndai@upc.edu.cn.

### Table of Contents

1. Synthesis of H<sub>3</sub>BTB- NH<sub>2</sub> ligand.
2. Materials and Instruments.
3. Synthesis, Crystal data, structure and characterization of UPC-99.
4. Simulation and calculation for gas selectivity by IAST methods.
5. Simulation and calculation for Q<sub>st</sub> by Clausius-Clapeyron equation.
6. Catalytic Cycloaddition of CO<sub>2</sub> with Epoxides of UPC-99.

1. Synthesis of H<sub>3</sub>BTB-NH<sub>2</sub> ligand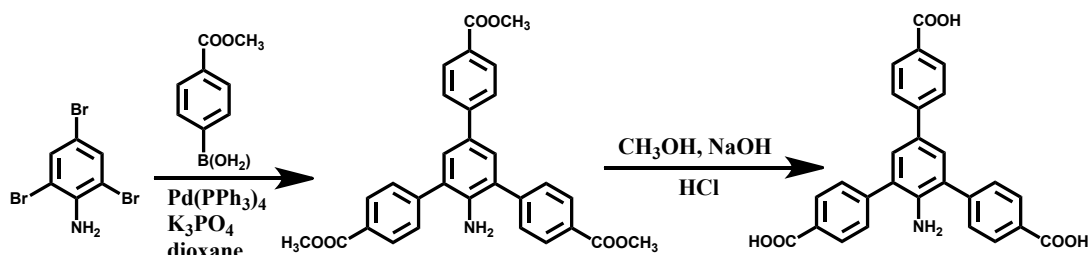Scheme S1. Synthetic procedures of the H<sub>3</sub>BTB-NH<sub>2</sub> ligand.**(1) Dimethyl 2'-amino-5'-(4-(methoxycarbonyl)phenyl)-[1,1':3',1''-terphenyl]-4,4''-dicarboxylate**

2,4,6-tribromoaniline (1.6 g, 4 mmol), Methyl 4-boronobenzoate (1.57 g, 14.4 mmol), Pd(PPh<sub>3</sub>)<sub>4</sub> (0.15 g, 0.13 mmol) and K<sub>3</sub>PO<sub>4</sub> (3.82 g, 18.0 mmol) were placed in a 500 mL two-necked round bottom flask under a N<sub>2</sub> gas atmosphere. The flask was further charged with a 200 mL of dry 1,4-dioxane, and the contents were heated for 48 h. After the mixture was cooled to room temperature, the solvent was removed, water was added. The water phase was washed with CH<sub>2</sub>Cl<sub>2</sub>. The mixed organic phases were dried with MgSO<sub>4</sub>. After the solvent was removed, the crude product was purified by column chromatography with CH<sub>2</sub>Cl<sub>2</sub> as the eluent. <sup>1</sup>H NMR (400 MHz, CDCl<sub>3</sub>) 3.87(s, 3H), 3.96(s, 6H), 7.59(d, 4H), 7.84(s, 2H), 8.16(d, 4H). Anal. Calcd. for C<sub>24</sub>H<sub>21</sub>NO<sub>6</sub> (mw 419): C, 68.73; N, 3.34; H, 5.05. Found: C, 68.80; N, 3.29; H, 5.10.

**(2) 2'-amino-5'-(4-carboxyphenyl)-[1,1':3',1''-terphenyl]-4,4''-dicarboxylic acid**

Dimethyl 2'-amino-5'-(4-(methoxycarbonyl)phenyl)-[1,1':3',1''-terphenyl]-4,4''-dicarboxylate (2.0 g, 4.8 mmol) was dissolved in 50 mL MeOH, 50 mL 2 M NaOH aqueous solution was added. The mixture was stirred at 50°C overnight. The organic phase was removed, the aqueous phase was acidified with diluted hydrochloric acid to give yellow precipitate, which was filtered and washed with water several times. <sup>1</sup>H NMR (400 MHz, CDCl<sub>3</sub>) 5.10 (s, 2H), 7.62(d, 6H), 8.07(d, 4H), 12.78(s, 3H). Anal. Calcd. for C<sub>21</sub>H<sub>15</sub>NO<sub>6</sub> (mw 377): C, 66.84; N, 3.71; H, 4.01. Found: C, 66.78; N, 3.73; H, 4.00.

### 2. Materials and Instruments

All the chemical reagents were purchased from chemical vendors and without further purification. The powder XRD diffractograms were obtained on a Panalytical X-Pert PRO diffractometer with Cu-K $\alpha$  radiation. Elemental analyses (C, H, N) were performed using a CE instruments EA 1110 elemental analyzer. Infrared spectroscopy (IR) were collected on a Nicolet 330 FTIR Spectromete within the 4000-400 cm<sup>-1</sup> region. Thermo-gravimetric analysis (TGA) measurements were carried out on a Mettler Toledo TGA instrument under a N<sub>2</sub> atmosphere with a heating rate 10°C /min at the range of 40-900°C. Gas adsorption experiments containing low-pressure H<sub>2</sub>, N<sub>2</sub> gas sorption experiments at 77 K, 87 K, CO<sub>2</sub>, CH<sub>4</sub>, C<sub>2</sub>H<sub>2</sub>, C<sub>2</sub>H<sub>4</sub>, C<sub>2</sub>H<sub>6</sub>, C<sub>3</sub>H<sub>6</sub> and C<sub>3</sub>H<sub>8</sub> light hydrocarbons experiments at 273 K and 298 K were carried out on the surface area analyzer ASAP-2020.

Catalytic experiment studies: The reactions catalytic cycloaddition of CO<sub>2</sub> and epoxides were implemented under solvent free environment at a certain temperature, pressure and reaction time. Epoxides (15.0 mmol), **UPC-99** as catalyst (0.01 mmol), TBAB (n-Bu<sub>4</sub>NBr) (1 mmol) in a 10 mL Schlenk tube. At the end of the reaction, the product is centrifuged and the supernatant is collected for further testing. **UPC-99** was centrifuged by DMA and methanol many times for the next cycle catalytic test. Conversion of products was determined by gas chromatography(GC-MS). (DB-1 column, L×I.D. × T.H. 30.0 m × 0.25 mm × 0.25  $\mu$ m; injector temperature 300 °C). Heating rate: 15 °C /min

## SUPPORTING INFORMATION

---

### 3. Synthesis, Crystal data, structure and characterization of UPC-99.

#### 3.1 Synthesis of UPC-99

$\text{Cu}(\text{NO}_3)_2 \cdot 3\text{H}_2\text{O}$  (0.035 g, 0.15 mmol),  $\text{H}_3\text{BTB-NH}_2$  (0.003g, 0.05 mmol) in 2 mL DMA- $\text{H}_2\text{O}$  (v/v = 1:1) were sealed in a 10 mL Teflon reactor, and heated to 75 °C in 60 min, kept 75 °C for 1200 min, then the reaction system was cooled to room temperature slowly at a rate of 0.1 °C/min. The blue, block-shaped crystals were obtained and washed with DMA and dried in the air (yield: 82%. based on Copper). Elemental analysis calcd (%) for **UPC-99**: C 55.70; H 3.44; N 2.41. Found: C 55.63; H 3.49; N 2.37. IR (KBr,  $\text{cm}^{-1}$ ): 3393 (s), 1608 (s), 1399 (s), 1259 (w), 1182(w), 1020(m), 788 (w), 592(w).

## 3.2 Crystal data, structure and characterization of UPC-99.

Table S1. Crystal data and structure refinement of UPC-99 with CCDC 1872997.

| Identification code                        | UPC-99                                                                         |
|--------------------------------------------|--------------------------------------------------------------------------------|
| Empirical formula                          | C <sub>54</sub> H <sub>40</sub> Cu <sub>3</sub> N <sub>2</sub> O <sub>16</sub> |
| Formula weight                             | 1163.53                                                                        |
| Temperature/K                              | 150.01(10)                                                                     |
| Crystal system                             | Cmce                                                                           |
| Space group                                | orthorhombic                                                                   |
| a/Å                                        | 59.7742(15)                                                                    |
| b/Å                                        | 29.1040(6)                                                                     |
| c/Å                                        | 13.6375(5)                                                                     |
| $\alpha$ /°                                | 90                                                                             |
| $\beta$ /°                                 | 90                                                                             |
| $\gamma$ /°                                | 90                                                                             |
| Volume/Å <sup>3</sup>                      | 23724.7(12)                                                                    |
| Z                                          | 2                                                                              |
| $\rho_{\text{calc}}$ mg/mm <sup>3</sup>    | 0.651                                                                          |
| $\mu$ /mm <sup>-1</sup>                    | 0.894                                                                          |
| F(000)                                     | 4744.0                                                                         |
| 2 $\Theta$ range for data collection       | 6.756 to 132.99                                                                |
| Reflections collected                      | 26580                                                                          |
| Independent reflections                    | 10550 [R <sub>int</sub> = 0.12410, R <sub>sigma</sub>                          |
| Data/restraints/parameters                 | 10550/978/343                                                                  |
| Goodness-of-fit on F <sup>2</sup>          | 0.953                                                                          |
| Final R indexes [I >= 2 $\sigma$ (I)]      | R <sub>1</sub> = 0.0930, wR <sub>2</sub> = 0.2668                              |
| Final R indexes [all data]                 | R <sub>1</sub> = 0.1219, wR <sub>2</sub> = 0.2955                              |
| Largest diff. peak/hole /e Å <sup>-3</sup> | 1.23/-0.80                                                                     |

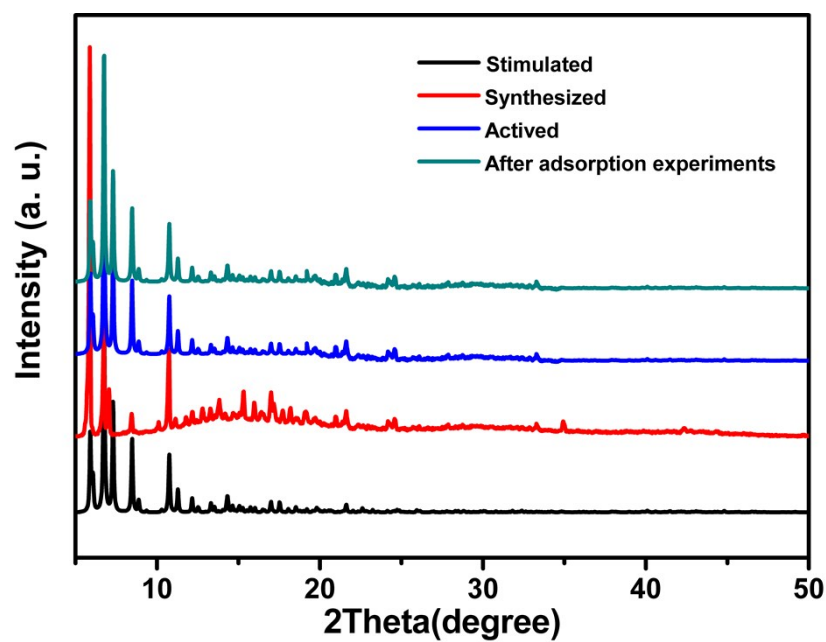

Figure S1. Powder X-ray diffraction PXRD data of UPC-99.

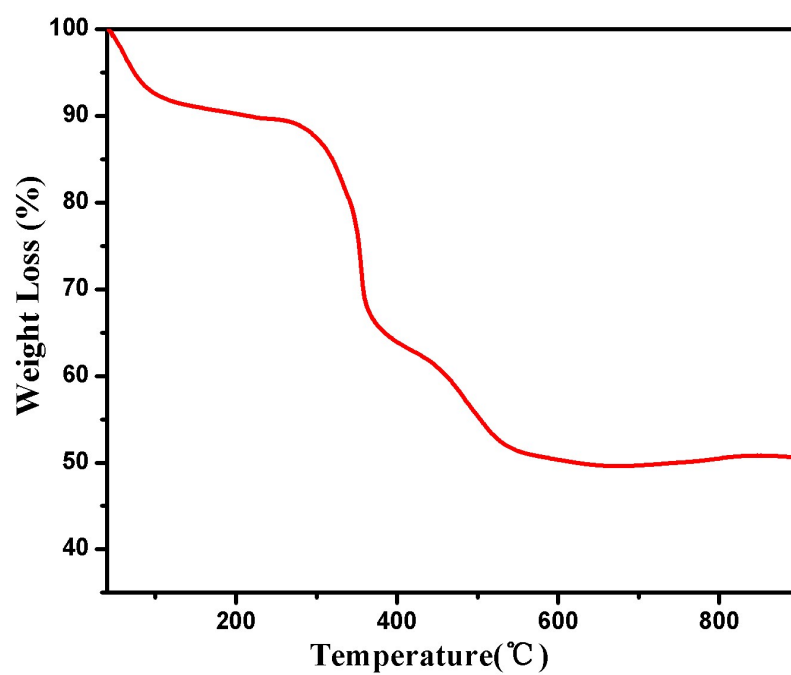

Figure S2. The TGA of UPC-99.

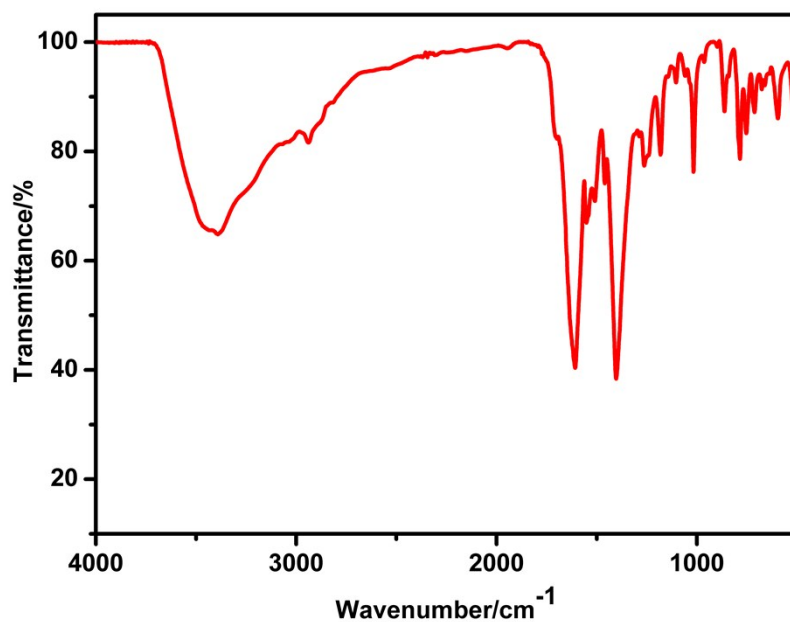

Figure. S3 The IR of UPC-99.

## 4. Simulation and calculation for gas selectivity by IAST methods.

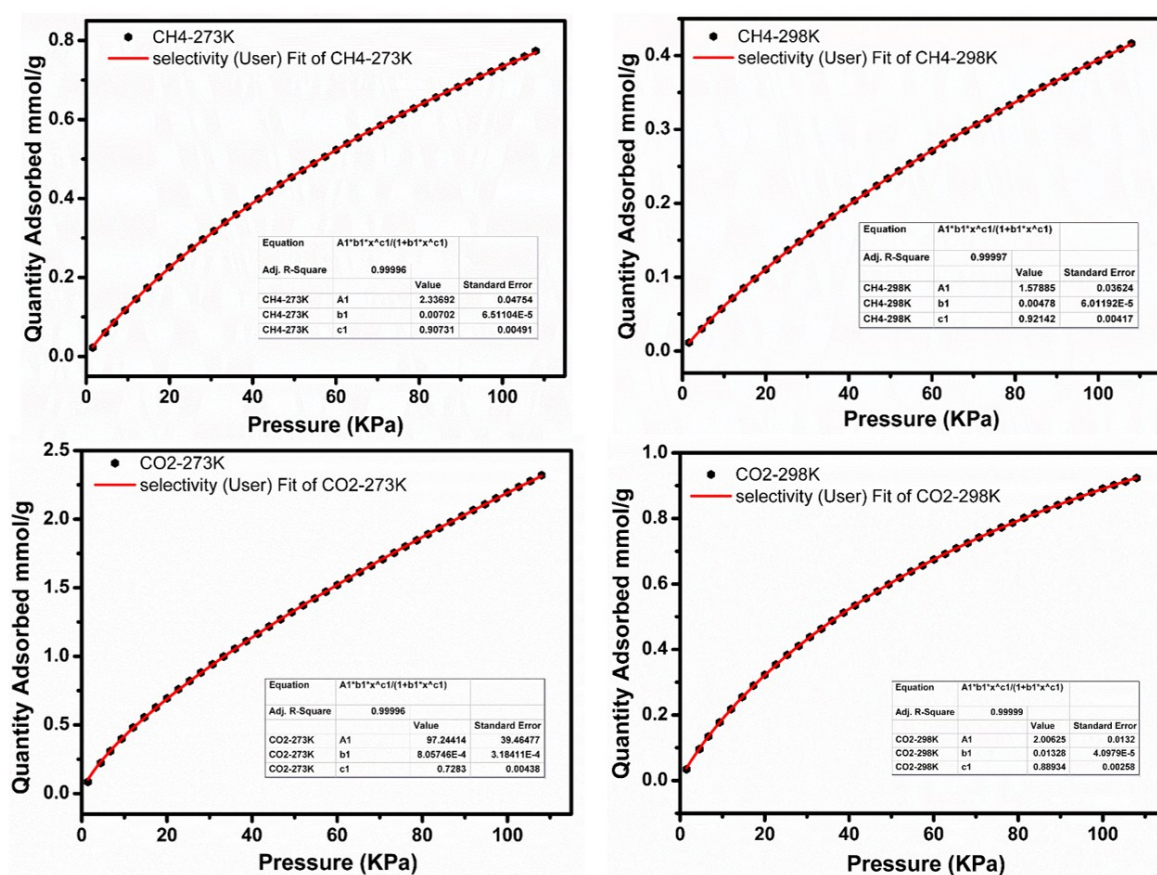



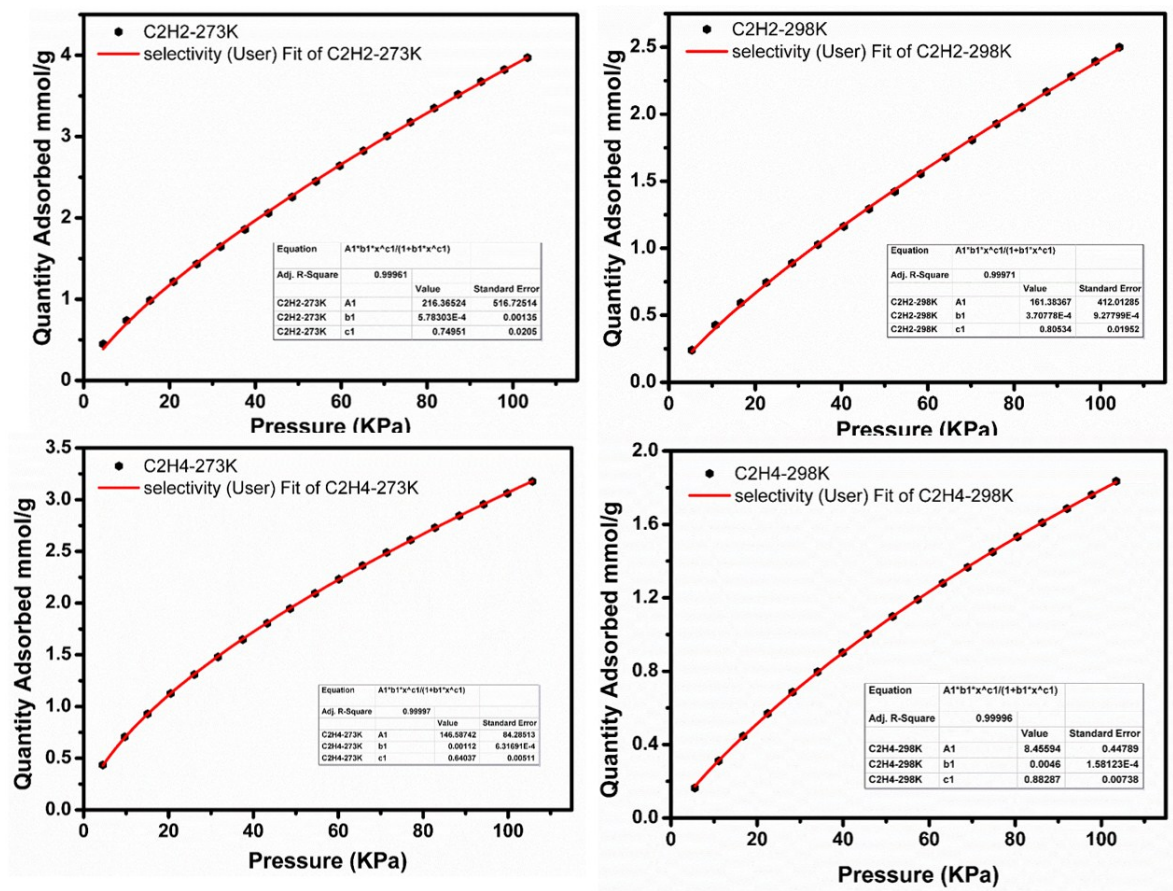

## SUPPORTING INFORMATION

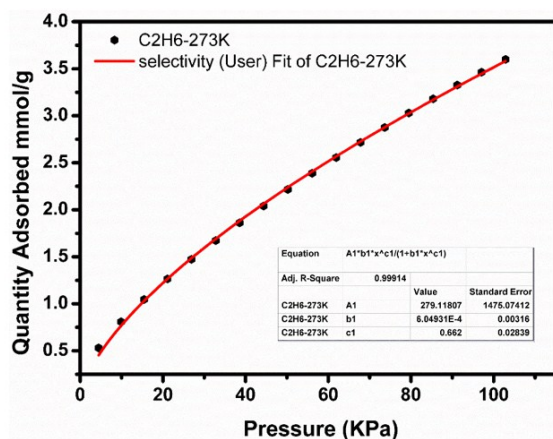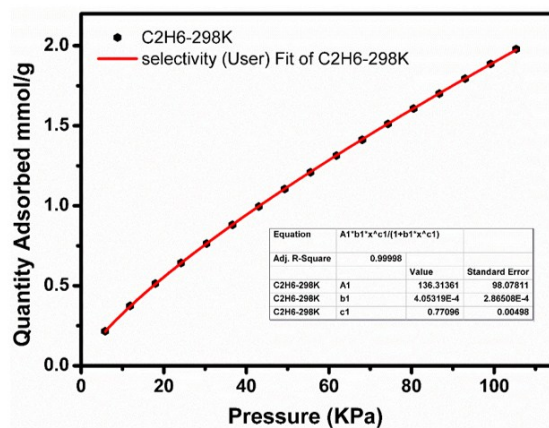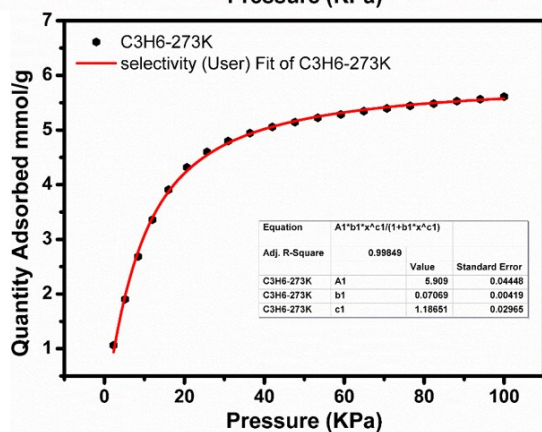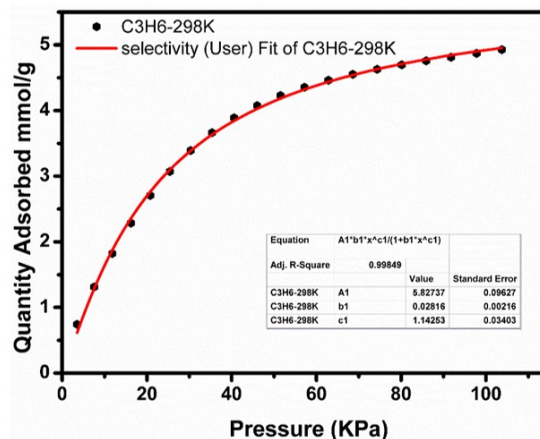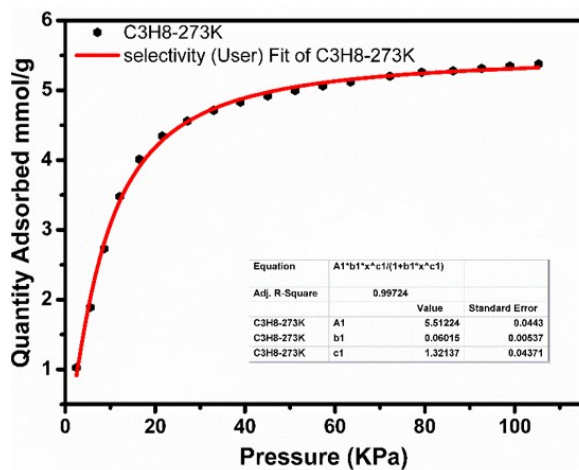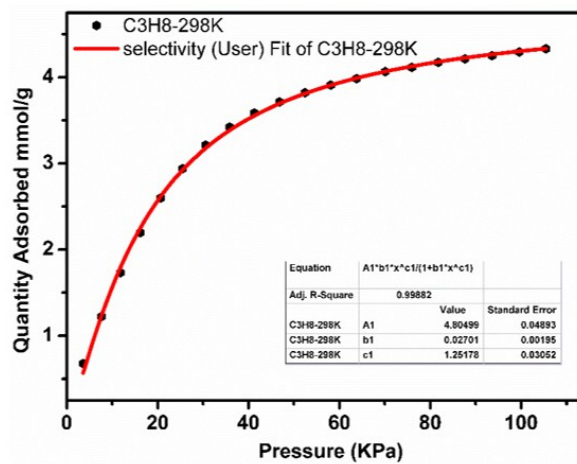

## SUPPORTING INFORMATION

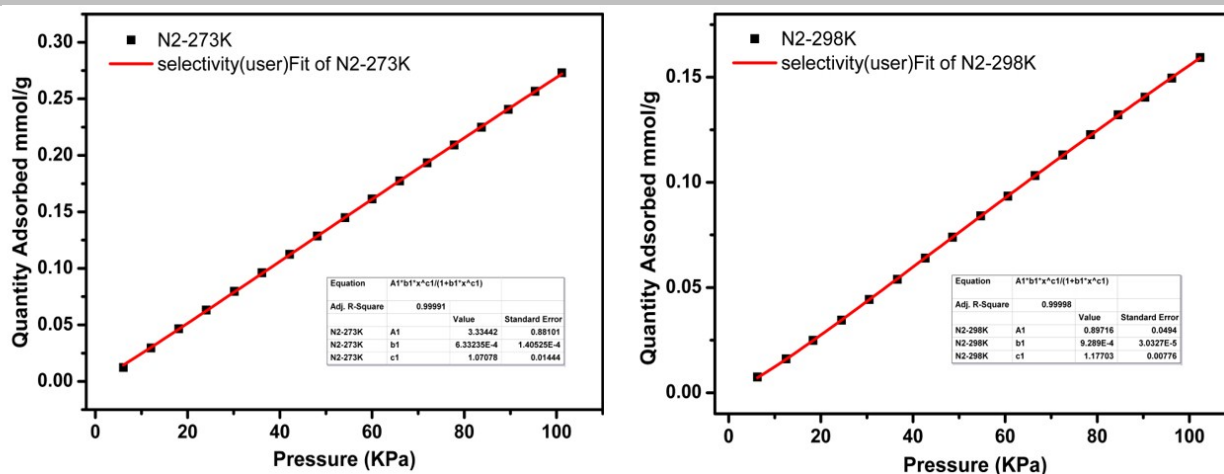

**Figure. S4** The detail of virial equation (solid lines) fitting to the experimental gases adsorption data for **UPC-99** by IAST methods.

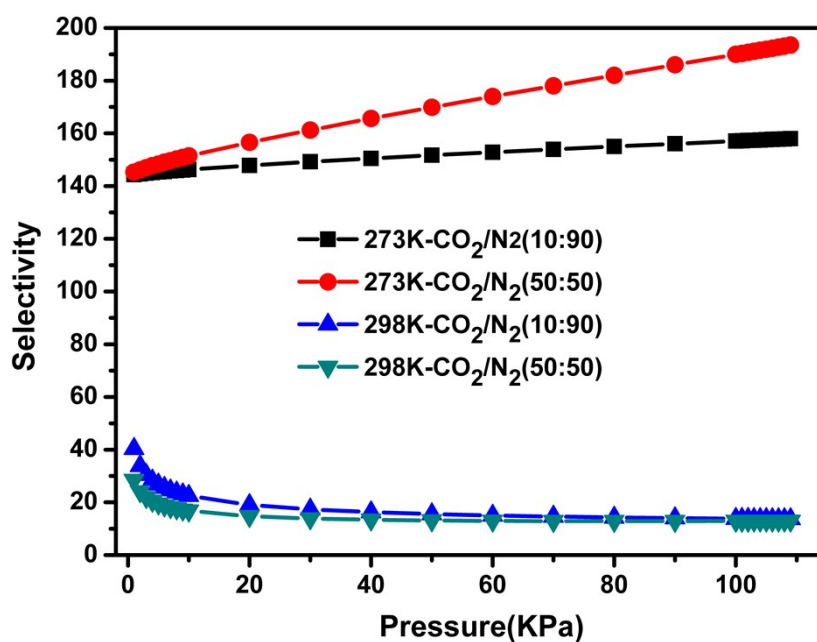

**Figure. S5** The selectivity for CO<sub>2</sub> over N<sub>2</sub> at 273 K and 298K.

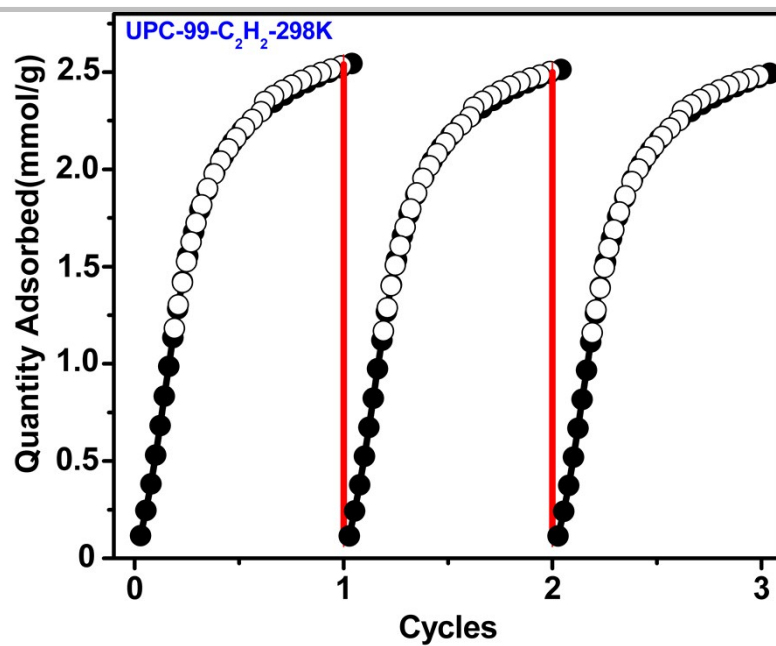

Figure. S6 The cyclic adsorption stability curves of  $\text{C}_2\text{H}_2$  at 298K for UPC-99.

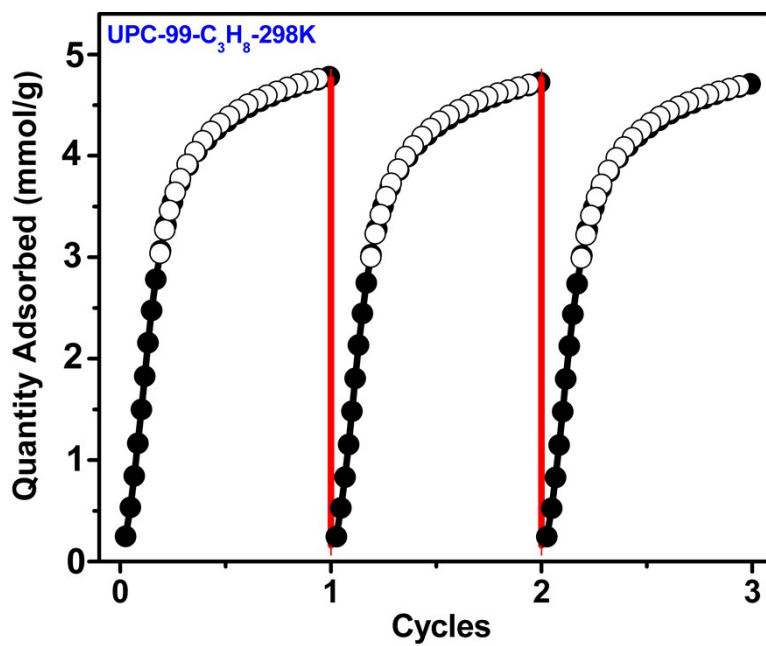

Figure. S7 The cyclic adsorption stability curves of  $\text{C}_3\text{H}_8$  at 298K for UPC-99.

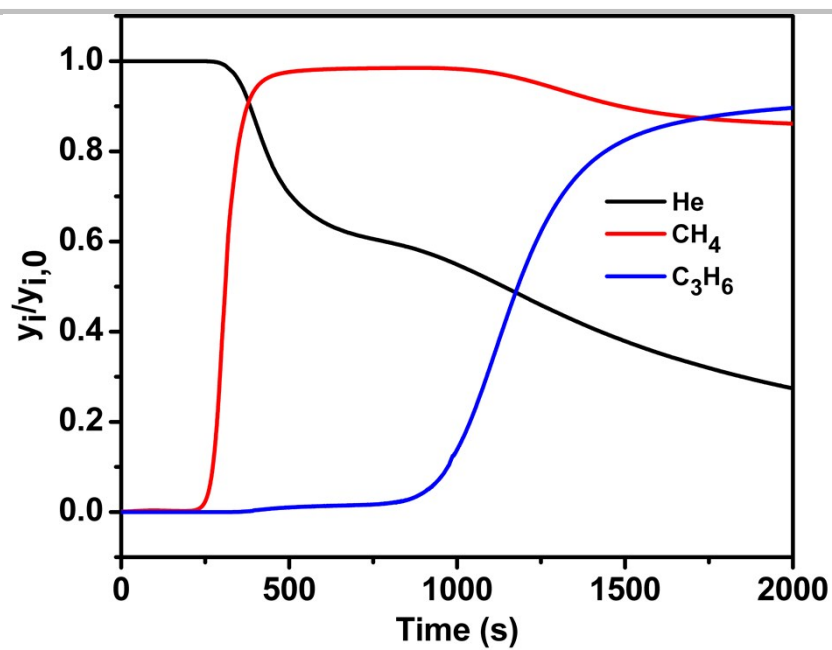

**Figure. S8** The breakthrough curves of C<sub>3</sub>H<sub>6</sub> and CH<sub>4</sub> gas mixtures (50:50) at 298K for UPC-99.



## SUPPORTING INFORMATION

### 5. Simulation and calculation for $Q_{st}$ by Clausius-Clapeyron equation.

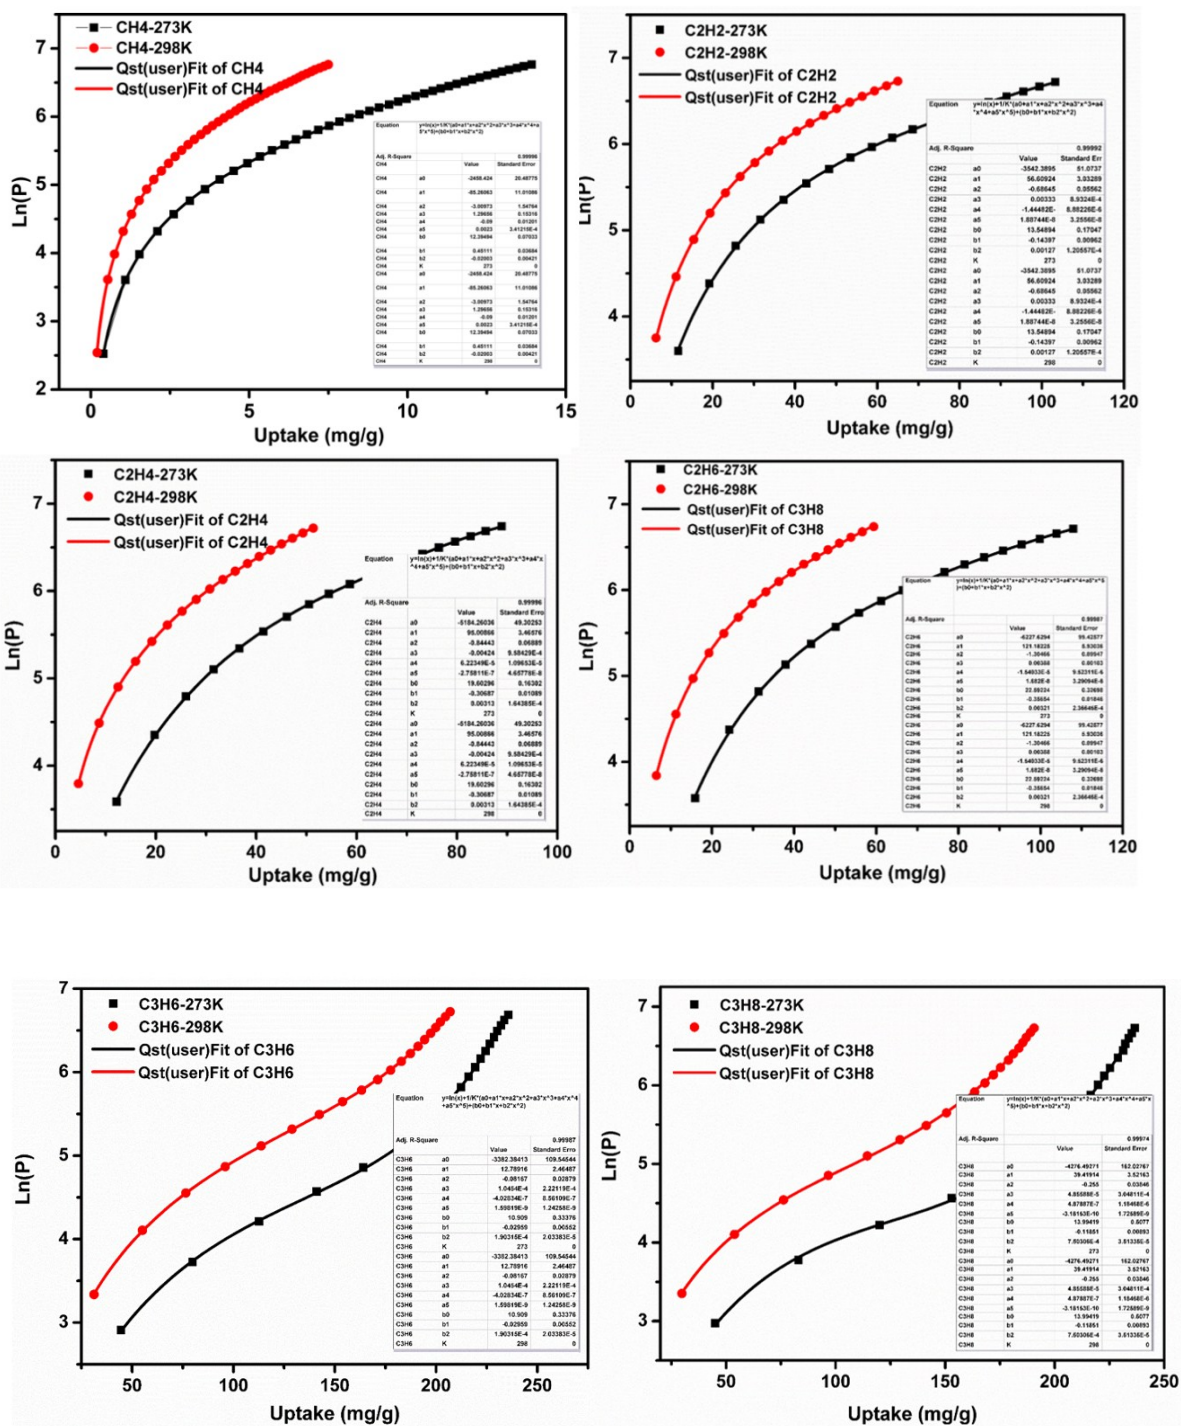

## SUPPORTING INFORMATION

**Table S2.** Comparison of Light Hydrocarbon Adsorption Data for Selected MOFs

| MOFs     | T   | CH <sub>4</sub> | C <sub>2</sub> H <sub>2</sub> | C <sub>2</sub> H <sub>4</sub> | C <sub>2</sub> H <sub>6</sub> | C <sub>3</sub> H <sub>6</sub> | C <sub>3</sub> H <sub>8</sub> | ref       |
|----------|-----|-----------------|-------------------------------|-------------------------------|-------------------------------|-------------------------------|-------------------------------|-----------|
| UPC-99   | 273 | 18.9            | 75.1                          | 87.4                          | 92.7                          | 127.5                         | 122.3                         | This work |
|          | 298 | 9.8             | 43.1                          | 44.3                          | 61.0                          | 119.5                         | 108.7                         |           |
| UPC-33   | 273 | 9.7             | 65.1                          | 43.6                          | 51.8                          | 114.2                         | 111.8                         | 1         |
|          | 298 | 7.0             | 44.3                          | 31.1                          | 35.0                          | 94.3                          | 93.6                          |           |
| FJI-C1   | 273 |                 | 135.9                         | 85.2                          | 123.6                         |                               | 160.9                         | 2         |
|          | 298 | 9.7             | 93.8                          | 64.0                          | 87.4                          |                               | 141.9                         |           |
| FJI-C4   | 273 | 32.7            | 82.8                          | 70.1                          | 73.4                          |                               | 74.7                          | 3         |
|          | 298 | 18.4            | 72.5                          | 61.4                          | 66.3                          |                               | 71.5                          |           |
| UTSA-33a | 296 | 9.2mg/g         | 97.1                          | 76.2                          | 83.0                          |                               |                               | 4         |
| 1-mim    | 273 | 14.65           | 119.42                        | 92.37                         | 101.03                        |                               | 102.92                        | 5         |
|          | 297 | 10.64           | 76.26                         | 64.95                         | 79.91                         |                               | 96.87                         |           |
| 1-eim    | 273 | 19.32           | 117.84                        | 87.30                         | 99.348                        |                               | 97.36                         | 5         |
|          | 297 | 11.48           | 73.70                         | 61.29                         | 75.38                         |                               | 86.60                         |           |
| 1-pim    | 273 | 16.24           | 101.42                        | 84.54                         | 93.78                         |                               | 97.31                         | 5         |
|          | 297 | 9.70            | 65.00                         | 53.72                         | 71.65                         |                               | 83.29                         |           |
| 1-buim   | 273 | 14.08           | 93.54                         | 73.16                         | 81.77                         |                               | 83.46                         | 5         |
|          | 297 | 8.86            | 56.14                         | 48.70                         | 63.00                         |                               | 75.22                         |           |
| UPC-21   | 273 | 43.2            | 196.5                         | 123.1                         | 137.6                         | 124.1                         | 116.2                         | 6         |
|          | 295 | 25.7            | 139.5                         | 98.4                          | 104.3                         | 110.1                         | 103.0                         |           |
| M'MOF-20 | 195 | 70              | 268                           | 81                            | 77                            |                               | 39                            | 7         |
|          | 273 |                 | 95.0                          | 53.0                          |                               |                               | 43.0                          |           |
|          | 298 | 8.0             | 81.0                          | 44.0                          | 49.0                          |                               | 47.0                          |           |
| UPC-35   | 273 | 11.0            | 72.5                          | 56.4                          | 70.1                          | 138.1                         | 128.7                         | 8         |
|          | 298 | 4.8             | 44.4                          | 35.9                          | 40.9                          | 118.3                         | 111.3                         |           |

## SUPPORTING INFORMATION

### 6. Catalytic Cycloaddition of CO<sub>2</sub> with Epoxides of UPC-99.

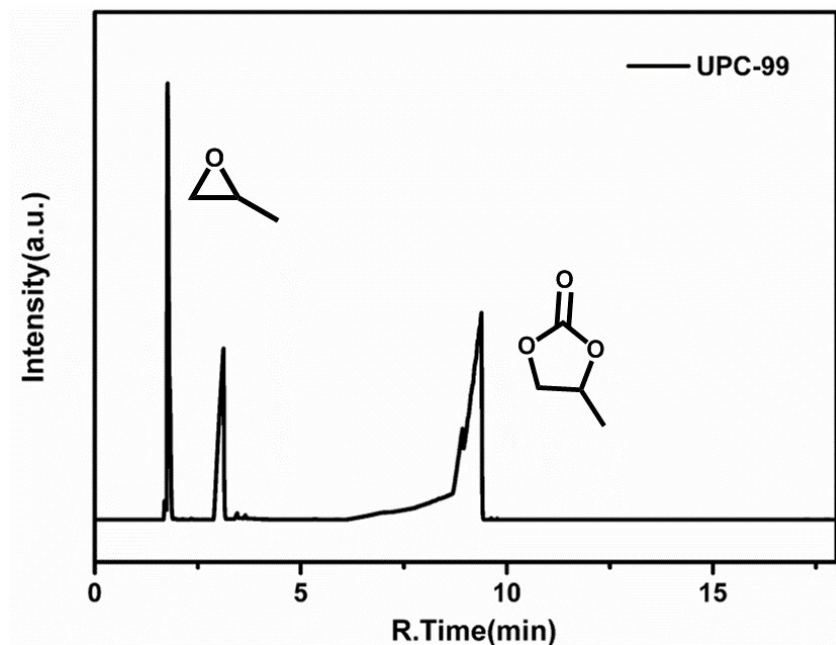

**Figure. S10** The GC spectrum for heterogeneous nature of catalysis in reaction of Propylene carbonate at room temperature and 1 bar. **MS**  $[M+H]^+$ : 102.0317.

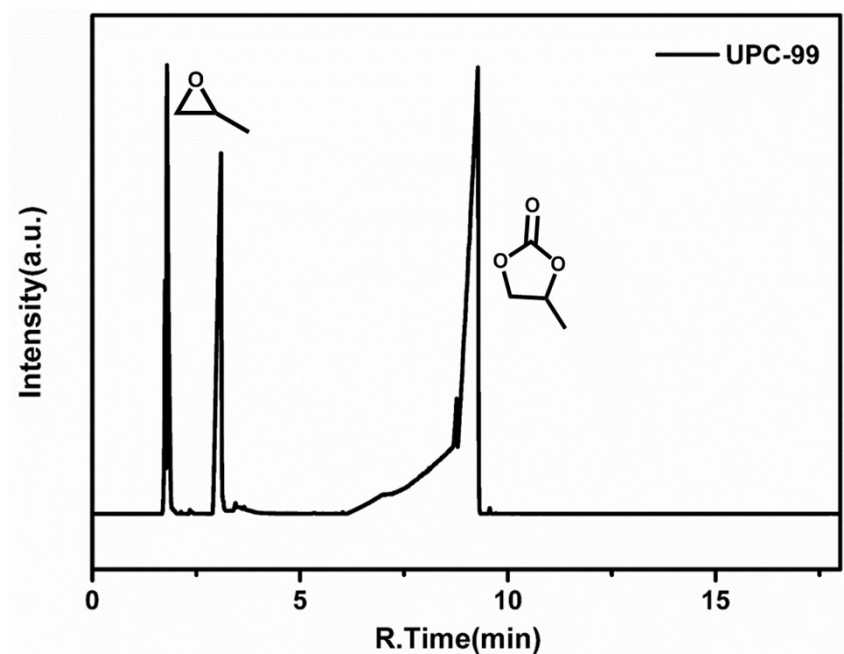

**Figure. S11** The GC spectrum for heterogeneous nature of catalysis in reaction of Propylene carbonate at 50°C and 6 bar. **MS**  $[M+H]^+$ : 102.0317.



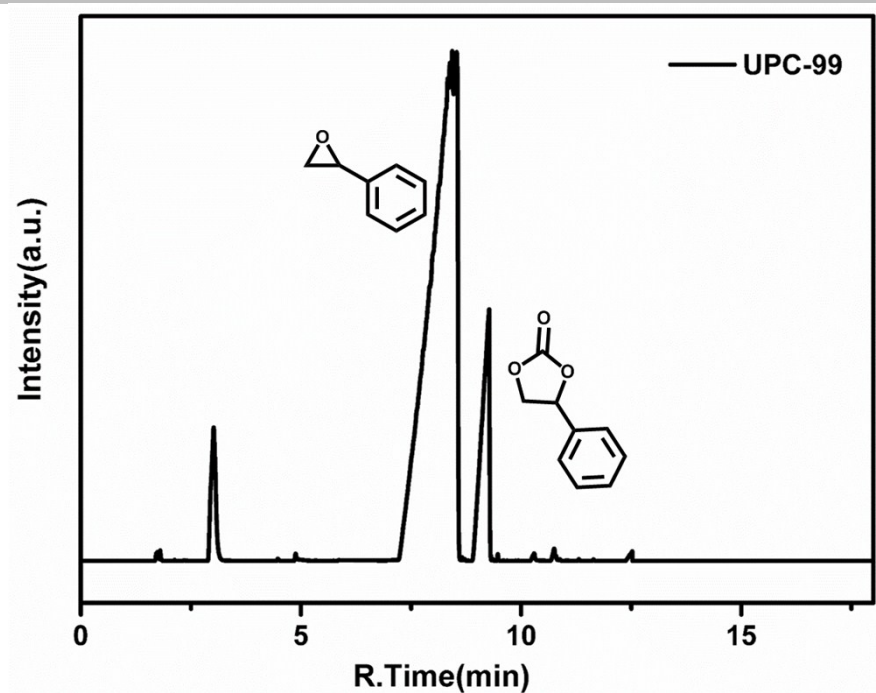

**Figure. S12** The GC spectrum for heterogeneous nature of catalysis in reaction of 4-phenyl-1,3-dioxolan-2-one at 50°C and 6 bar. MS  $[M+H]^+$ : 164.0473.

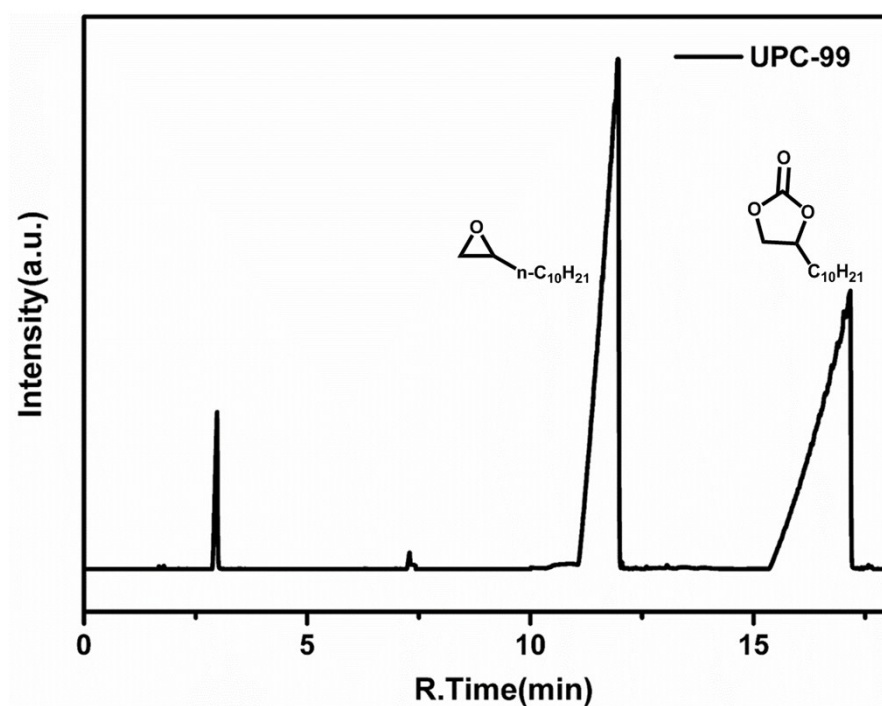

**Figure. S13** The GC spectrum for heterogeneous nature of catalysis in reaction of 4-decyl -1,3-dioxolan-2-one at 50°C and 6 bar. MS  $[M+H]^+$ : 228.1725.

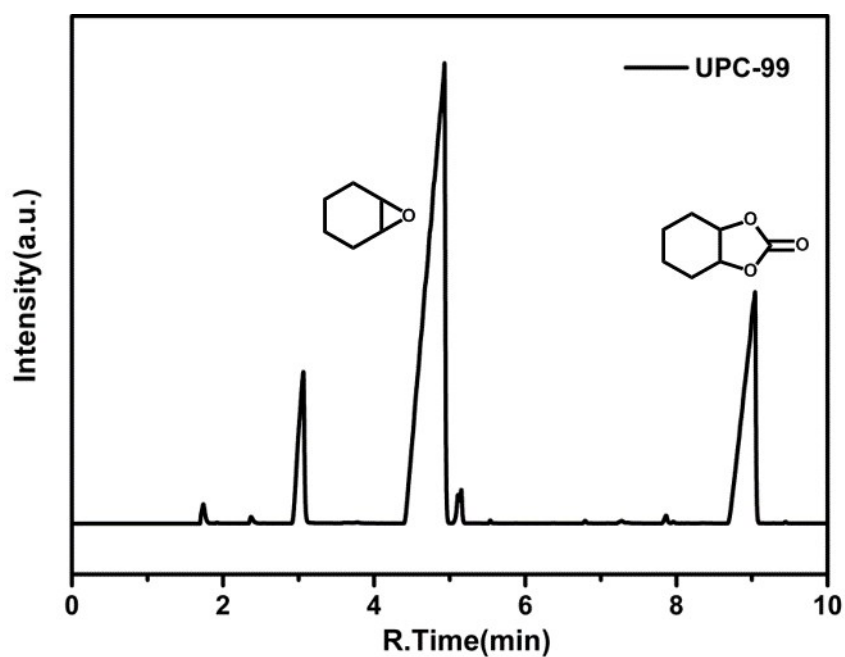

**Figure. S14** The GC spectrum for heterogeneous nature of catalysis in reaction of hexahydrobenzo[d][1,3]dioxol-2-one at 50°C and 6 bar after two recycle. **MS**  $[M+H]^+$ : 142.0630.

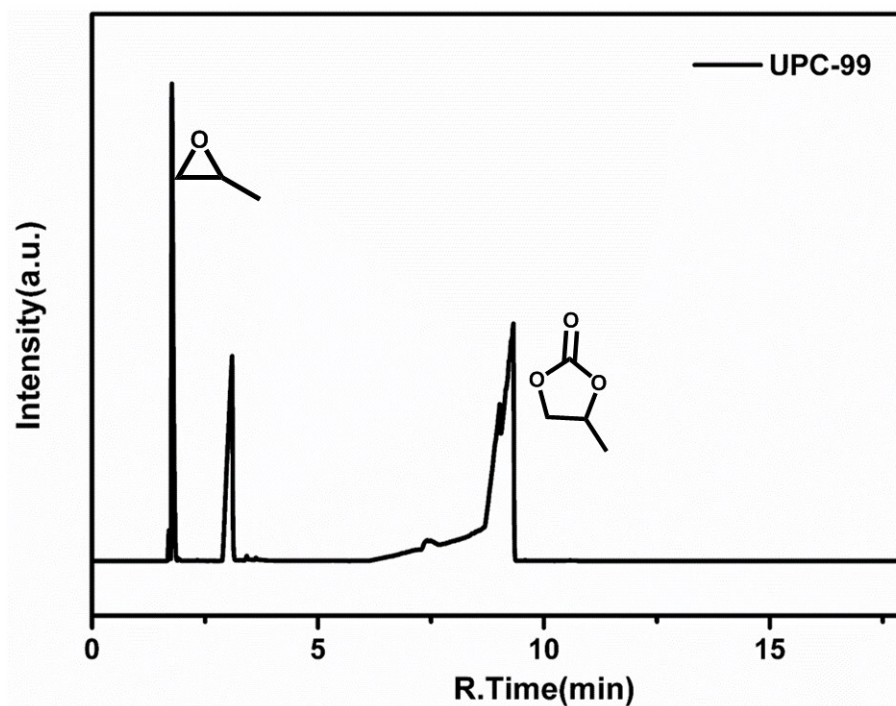

**Figure. S15** The GC spectrum for heterogeneous nature of catalysis in reaction of Propylene carbonate at 50°C and 6 bar after one recycle. **MS**  $[M+H]^+$ : 102.017.

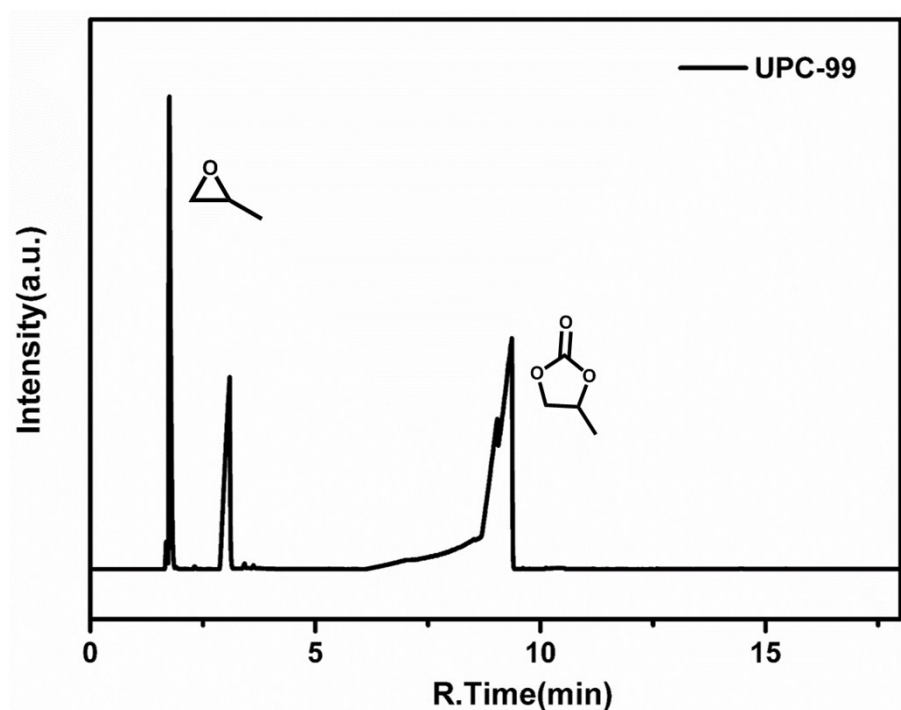

**Figure. S16** The GC spectrum for heterogeneous nature of catalysis in reaction of Propylene carbonate at 50°C and 6 bar after two recycle. MS  $[M+H]^+$ : 102.0317.

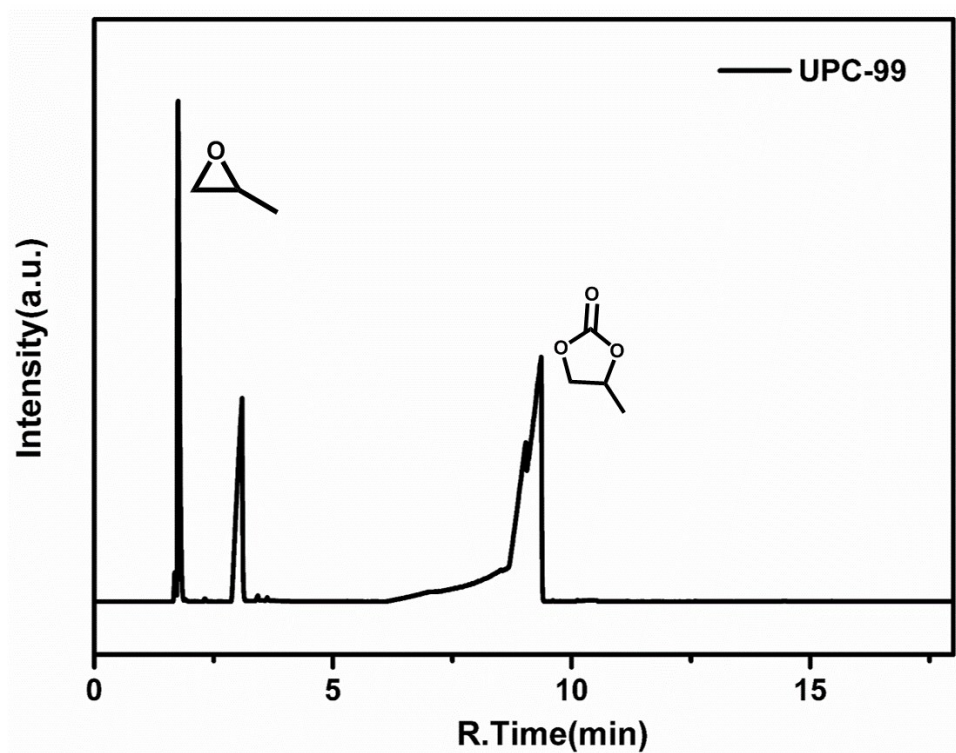

**Figure. S17** The GC spectrum for heterogeneous nature of catalysis in reaction of Propylene carbonate at 50°C and 6 bar after three recycle. MS  $[M+H]^+$ : 102.0317.

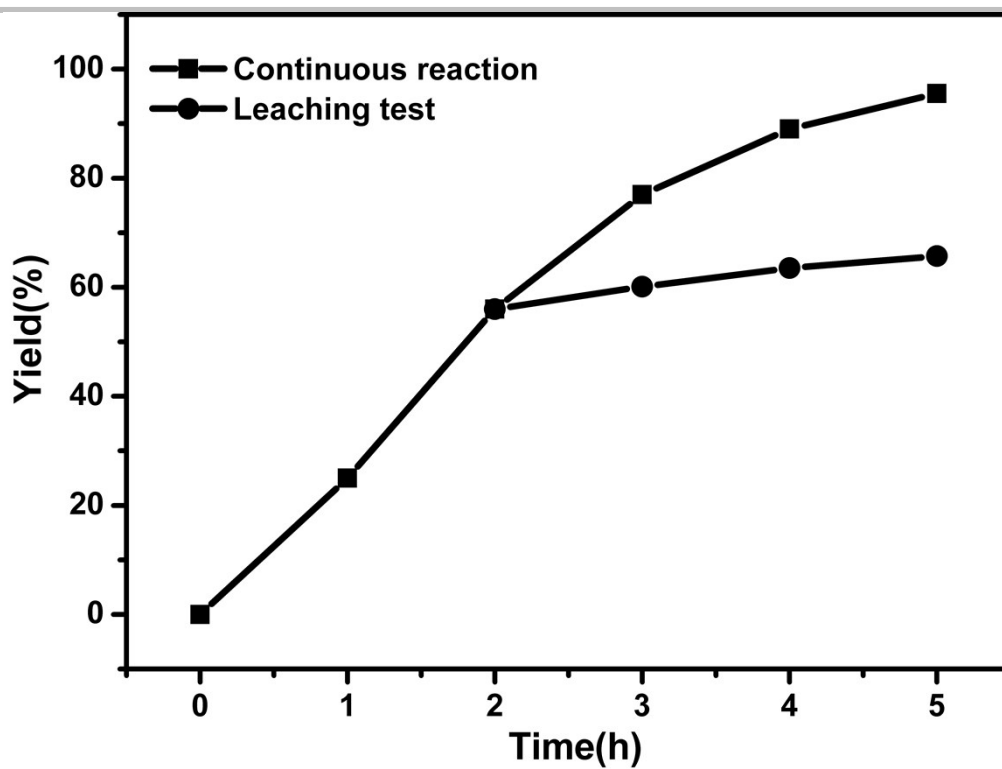

Figure. S18 The leaching test for catalysis in reaction of Propylene carbonate at 50°C and 6 bar  
(●) catalyst was removed after 2 hour.

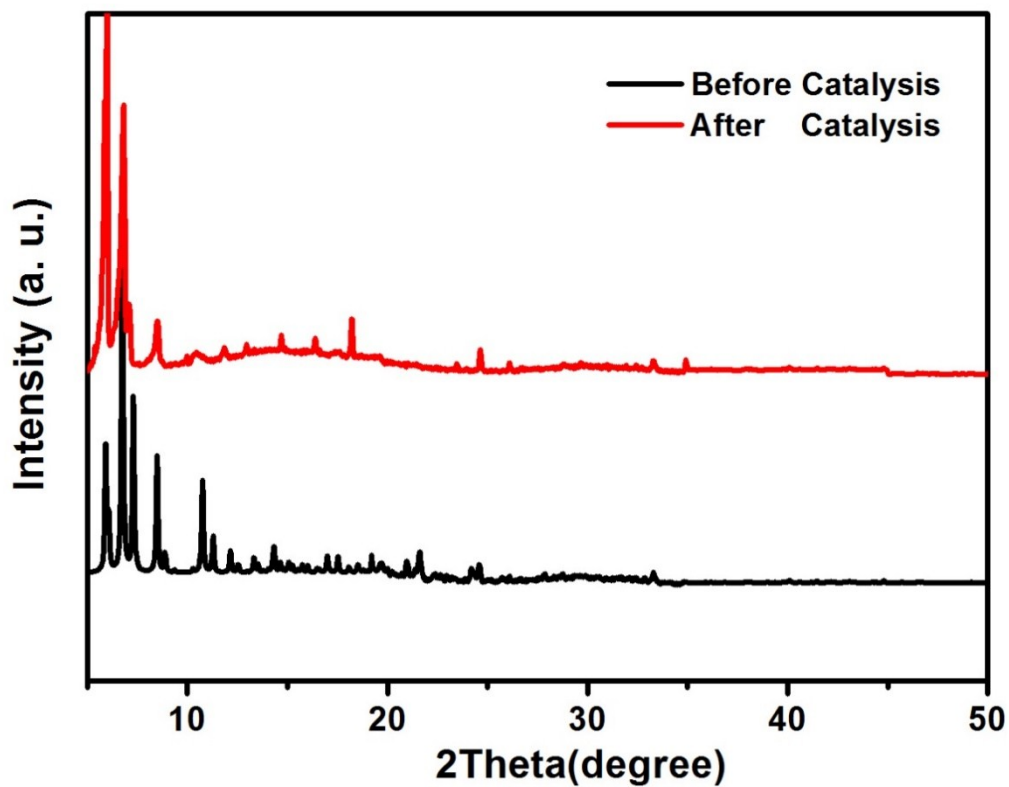

Figure. S19 The PXRD of UPC-99 before and after catalysis.

## SUPPORTING INFORMATION

**Table S3.** Comparison of catalysts performances in the cycloaddition of CO<sub>2</sub> with different epoxides for selected MOFs.

| MOF                            | Catalytic type                        | T(°C) | P(bar) | Time(h) | Yields(%) | ref       |
|--------------------------------|---------------------------------------|-------|--------|---------|-----------|-----------|
| <b>UPC-99</b>                  | 1(R=CH <sub>3</sub> )                 | 25    | 1      | 48      | 80.21     | This work |
|                                | 1(R=CH <sub>3</sub> )                 | 50    | 6      | 5       | 95.50     | This work |
|                                | 2(R=Ph)                               | 50    | 6      | 5       | 49.86     | This work |
|                                | 3(R=C <sub>10</sub> H <sub>21</sub> ) | 50    | 6      | 5       | 60.64     | This work |
| MOF-505                        | 1                                     | 25    | 1      | 48      | 48.0      | 9         |
| HKUST-1                        | 1                                     | 25    | 1      | 48      | 49.2      | 9         |
| (I-)Meim-UiO-66                | 2                                     | 120   | 2      | 24      | 46        | 10        |
| PCN-900(Eu)-<br>CoTCPP-CoBPYDC | 1                                     | 50    | 1      | 20      | 93        | 11        |
|                                | 2                                     | 50    | 1      | 20      | 81        | 11        |
| MMPF-9                         | 1                                     | 25    | 1      | 48      | 87.4      | 12        |
| Zn-MOF                         | 1                                     | 100   | 1      | 16      | 99        | 13        |
|                                | 2                                     | 100   | 1      | 16      | 89        | 13        |
| gea-MOF-1                      | 1                                     | 120   | 20     | 6       | 88        | 14        |
| Co-MOF                         | 1                                     | 25    | 1      | 48      | 57.1      | 15        |
| UIO-67-IL                      | 2                                     | 90    | 1      | 3       | 51        | 16        |
| ZIF-8                          | 2                                     | 100   | 7      | 5       | 54        | 17        |

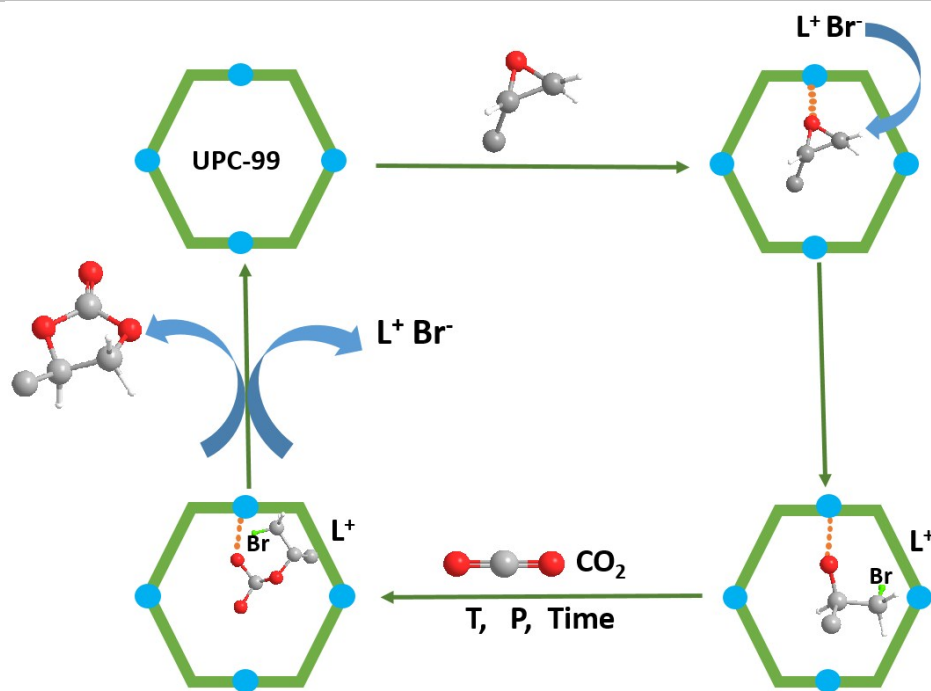

**Figure. S20** The catalytic mechanism for the cycloaddition of CO<sub>2</sub> with epoxides into cyclic carbonates catalyzed by **UPC-99**. (The blue ball represents the open Cu(II) sites; L<sup>+</sup> =tetra-n-tertbutylammonium).

## References

1. W.D. Fan, Y.T. Wang, Q. Zhang, Angelo Kirchon, Z.Y. Xiao, L.L. Zhang, F.N. Dai, R.M. Wang, and D.F. Sun. *Chem. Eur. J.* 2017, 23, 1-8.
2. Y. B. Huang, Z.J. Lin, H. R. Fu, F. Wang, M. Shen, X. S. Wang, and R. Cao. *ChemSusChem*. 2014, 7, 2647-2653.
3. L. Li, X. S. Wang, J. Liang, Y. B. Huang, H. F. Li, Z. J. Lin, and R. Cao. *ACS Appl. Mater. Interfaces*. 2016, 8, 9777-9781.
4. Y. B. He, Z. J. Zhang, S. C. Xiang, F. R. Fronczek, R. Krishna, and B. L. Chen. *Chem. Eur. J.* 2012, 18, 613-619.
5. H. R. Fu and J. Zhang. *Inorg. Chem.* 2016, 55, 3928-3932.
6. M. H. Zhang, X. L. Xin, Z. Y. Xiao, R. M. Wang, L. L. Zhang and D. F. Sun. *J. Mater. Chem. A*, 2017, 5, 1168-1175.
7. N. Sikdar, S. Bonakala, R. Haldar, S. Balasubramanian, and T. K. Maji. *Chem. Eur. J.* 2016, 22, 6059-6070.
8. Y.T. Wang, W.D. Fan, X. Wang, Y.F. Han, L.L. Zhang, D. Liu, F.N. Dai, and D.F. Sun. *Inorg, Chem. Front.*, 2018, 5, 2408-2412.
9. W.Y. Gao, Y. Chen, Y. H. Niu, K. Williams, L. Cash, S. Q. Ma. et al., *Angew. Chem. Int. Ed.* 2014, 53, 2615-2619.

## SUPPORTING INFORMATION

---

10. J. Liang, R.P. Chen, X.Y. Wang, T.T. Liu, X.S. Wang, Y.B. Huang, and R. Cao. *Chem. Sci.*, 2017, 8, 1570-1575.
11. L.L. Zhang, S. Yuan, L. Feng, B.B. Guo, J.S. Qin, B. Xu, C. Lollar, D.F. Sun, H.C. Zhou. *Angew. Chem. Int. Ed.* 2018, 57, 5095-5099.
12. W.Y. Gao, L. Wojtas, S.S. Ma. *Chem. Commun.*, 2014, 50, 5316-5318
13. Y.H. Han, Z.Y. Zhou, C.B. Tiana and S.W. Du. *Green Chem.*, 2016, 18, 4086-4091.
14. V. Guillermin, Ł.J. Weseliński, Y. Belmabkhout, A. J. Cairns, V. D'Elia, Ł. Wojtas, K. Adil and M. Eddaoudi. *NATURE CHEMISTRY*. 2014, 6, 673-680.
15. H.H. Wang, L. Hou, Y.Z. Li, C.Y. Jiang, Y.Y. Wang, Z.H. Zhu. *ACS Appl. Mater. Interfaces*. 2017, 9, 17969-17976.
16. L.G. Ding, B.J. Yao, W.L. Jiang, J.T. Li, Q.J. Fu, Y.A. Li, Z.H. Liu, J.P. Ma, Y.B. Dong. *Inorg. Chem.* 2017, 56, 2337-2344.
17. M.Q. Zhu, D. Srinivas, S. Bhogeswararao, P. Ratnasamy, M. A. Carreon. *Catalysis Communications*. 2013, 32, 36-4.
